# Supplementary material for: Assessment of Traffic Accidents in Japan during the COVID-19 Pandemic vs. Previous Years: A Preliminary Report
Source: MDPI journal article supplement (doi:10.3390/healthcare10050860), 2022-05-06
Supplement: s1 [file s1]

**Supplementary Table S1.** Monthly observed vs expected rates of traffic accidents in Japan in 2020–2021.

| Year | Month     | Observed Rate | Expected Rate (95% CI) | Observed vs. Expected Rate Ratio |
|------|-----------|---------------|------------------------|----------------------------------|
| 2020 | January   | 21.8          | 23.2 (21.6–24.9)       | 0.94 (0.93–0.95)                 |
|      | February  | 21.8          | 22.3 (21.1–23.7)       | 0.98 (0.96–0.99)                 |
|      | March     | 22.0          | 25.0 (23.4–26.7)       | 0.88 (0.87–0.89)                 |
|      | April     | 16.5          | 23.9 (21.9–26.0)       | 0.69 (0.68–0.70)                 |
|      | May       | 14.4          | 23.4 (20.9–26.2)       | 0.61 (0.61–0.62)                 |
|      | June      | 18.9          | 22.1 (19.7–24.7)       | 0.86 (0.85–0.87)                 |
|      | July      | 19.8          | 23.4 (21.0–26.0)       | 0.85 (0.84–0.86)                 |
|      | August    | 19.6          | 23.5 (20.4–27.0)       | 0.84 (0.83–0.85)                 |
|      | September | 20.1          | 21.9 (20.3–23.7)       | 0.92 (0.90–0.93)                 |
|      | October   | 22.9          | 24.9 (22.8–27.2)       | 0.92 (0.91–0.93)                 |
|      | November  | 22.7          | 24.9 (23.1–26.9)       | 0.91 (0.90–0.92)                 |
|      | December  | 25.1          | 26.2 (24.3–28.3)       | 0.96 (0.95–0.97)                 |
| 2021 | January   | 19.0          | 21.5 (19.8–23.3)       | 0.89 (0.87–0.90)                 |
|      | February  | 18.7          | 20.6 (19.3–22.0)       | 0.91 (0.90–0.92)                 |
|      | March     | 21.1          | 23.1 (21.4–24.9)       | 0.92 (0.91–0.93)                 |
|      | April     | 20.0          | 22.2 (20.1–24.5)       | 0.90 (0.89–0.91)                 |
|      | May       | 17.8          | 21.8 (19.1–24.8)       | 0.82 (0.81–0.83)                 |
|      | June      | 19.4          | 20.2 (17.7–23.0)       | 0.96 (0.95–0.97)                 |
|      | July      | 19.8          | 21.5 (19.0–24.3)       | 0.92 (0.91–0.94)                 |
|      | August    | 19.0          | 21.6 (18.4–25.4)       | 0.88 (0.87–0.89)                 |
|      | September | 18.3          | 20.1 (18.4–22.0)       | 0.91 (0.90–0.92)                 |
|      | October   | 21.7          | 23.0 (20.8–25.4)       | 0.95 (0.93–0.96)                 |
|      | November  | 22.6          | 23.1 (21.2–25.3)       | 0.98 (0.97–0.99)                 |
|      | December  | 25.7          | 23.9 (21.9–26.1)       | 1.07 (1.06–1.08)                 |
